# Supplementary material for: Self-extinguishing electrolytes using fluorinated alkyl phosphates for lithium batteries
Source: Royal Society of Chemistry journal article supplement (doi:10.1039/c6ta09915g), 2017-01-01
Supplement: c6ta09915g1.pdf [file c6ta09915g1.pdf]

## Electronic Supplementary Information

### Self-extinguishing electrolyte using fluorinated alkyl phosphate for lithium batteries

Tohru Shiga\*, Yuichi Kato, Hiroki Kondo, and Chika-aki Okuda

Toyota Central Research & Development Laboratories Inc.

E-mail: e0560@mosk.tytlabs.co.jp

#### 1. Materials

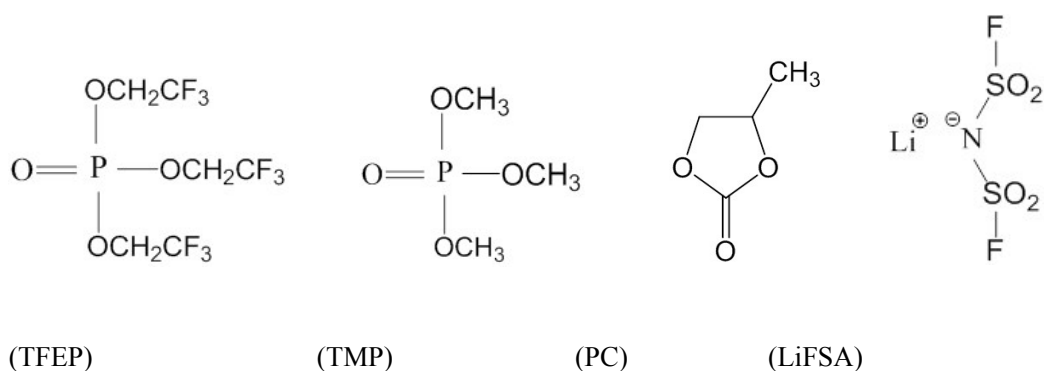

Figure S1. Chemical structures of solvents and supporting salt.

#### 2. Experimental

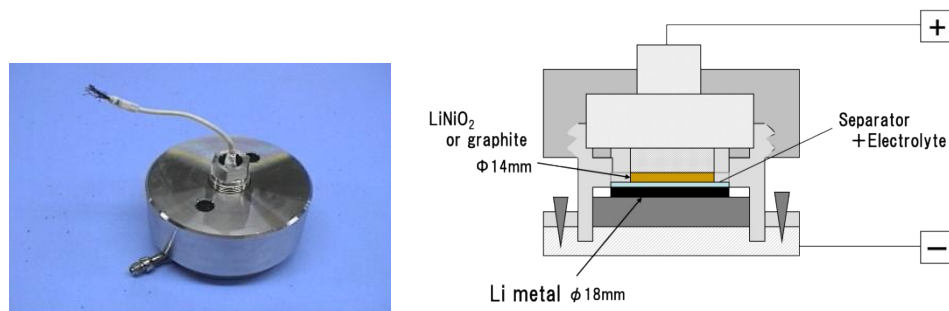

Figure S2. Photograph and schematic illustration of coin cell.

### 3. Results

#### 3.1 Raman results

The Raman profile due to the stretching vibration of P=O in TFEP, located near 1300  $\text{cm}^{-1}$ , was curve-fitted by three components A, B, and C with peaks at 1286, 1309, and 1328  $\text{cm}^{-1}$  (Fig. S3 and Table I). The results showed the existence of three components, A, B, and C. The DFT calculation was made to assign the three components. Although the calculated and experimental data did not match perfectly (Fig.S4), the signal at 1328  $\text{cm}^{-1}$  (component C) was assigned to the bending vibration of the  $\text{OCH}_2\text{CF}_3$  units. Therefore, the peak at 1328  $\text{cm}^{-1}$  was unchanged for LiFSA concentrations up to 3.3 M ( $[\text{TFEP}]/[\text{LiFSA}]=2$ ). The component A was estimated to be the stretching of P=O group in free TFEP. The component B reflected stretching of P=O group in solvated TFEP, but unfortunately involved information for the deformation of P-O- $\text{CH}_2\text{CF}_3$  of solvated and free TFEP molecules. Thus the Raman results gave no distinct information about Li-ion solvation.

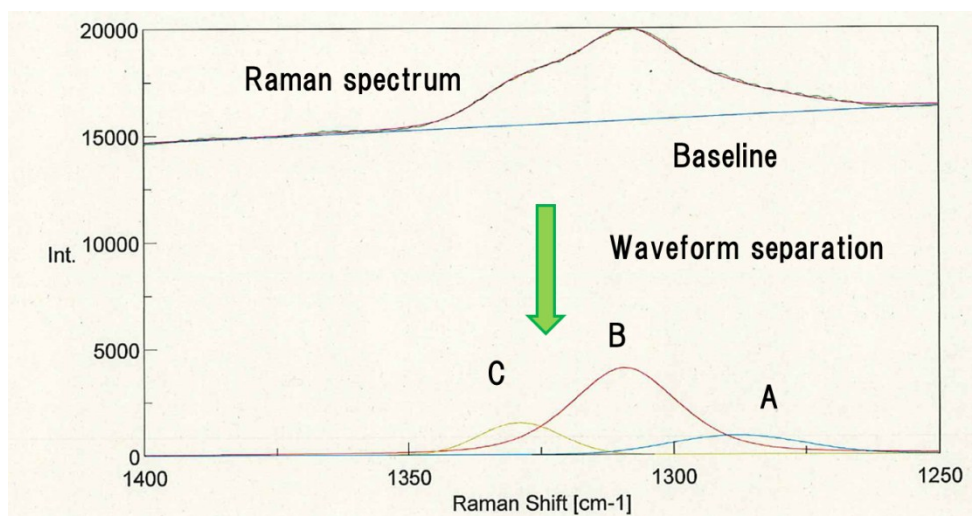

Figure S3. Waveform separation of Raman spectra for the  $[\text{TFEP}]/[\text{LiFSA}]=2$  electrolyte.

Table SI: Waveform separation of Raman spectra for the TFEP electrolytes with various concentrations of LiFSA.

| Sample<br>LiFSA : TFEP | Peak intensity (counts) / Ratio (%) |             |             |
|------------------------|-------------------------------------|-------------|-------------|
|                        | Component A                         | Component B | Component C |
| 0 : 1                  | 1320 / 16                           | 5263 / 64   | 1670 / 20   |
| 1 : 8                  | 1049 / 15                           | 4634 / 65   | 1499 / 21   |
| 1 : 4                  | 889 / 14                            | 4055 / 63   | 1509 / 23   |
| 1 : 2                  | 624 / 12                            | 3584 / 69   | 1008 / 19   |

The experimental spectra were curve-fitted as three components (A, B, and C) with peaks at 1286, 1309, and 1328  $\text{cm}^{-1}$ .

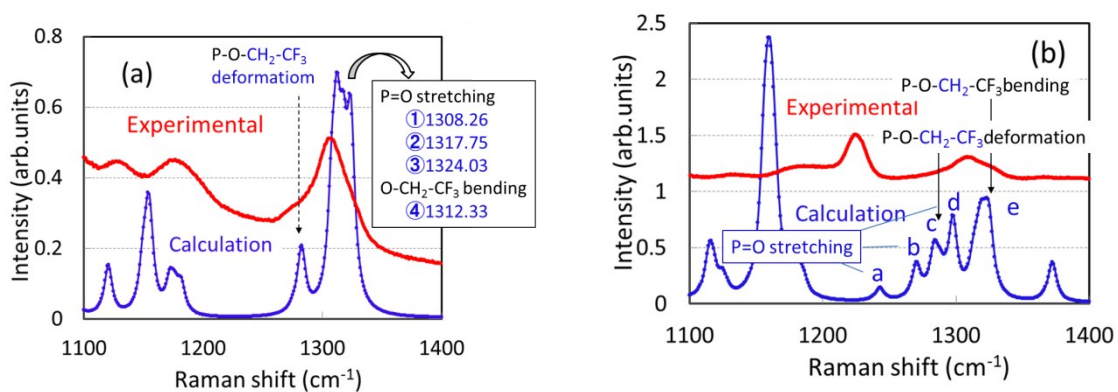

Figure S4: Comparison of the experimental and calculated Raman spectra for TFEP (left) and the  $[\text{TFEP}]/[\text{LiFSA}]=2$  electrolyte (right).

3.2 Representative geometry of a Li ion with FSA anion and two solvent molecules.

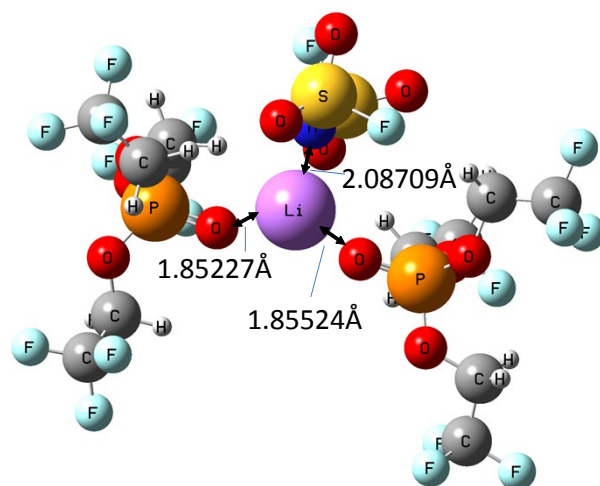

(a) [TFEP]/[LiFSA] = 2

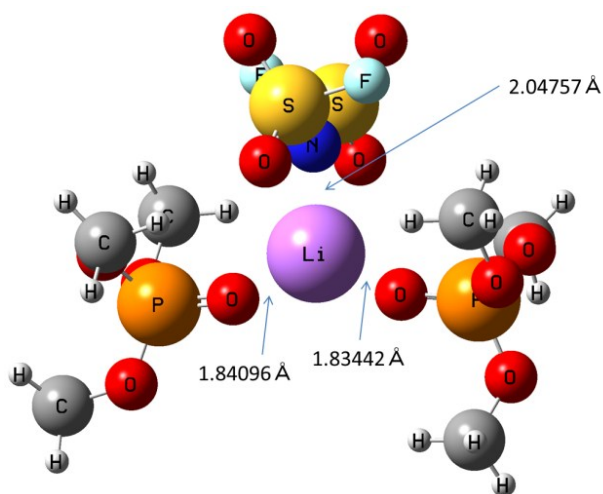

(b) [TMP]/[LiFSA] = 2

Figure S5: Structure of Li ion solvated by one LiFSA and two solvent molecules.

### 3.3 Potential window of the [TFEP]/[LiFSA]=2 electrolyte

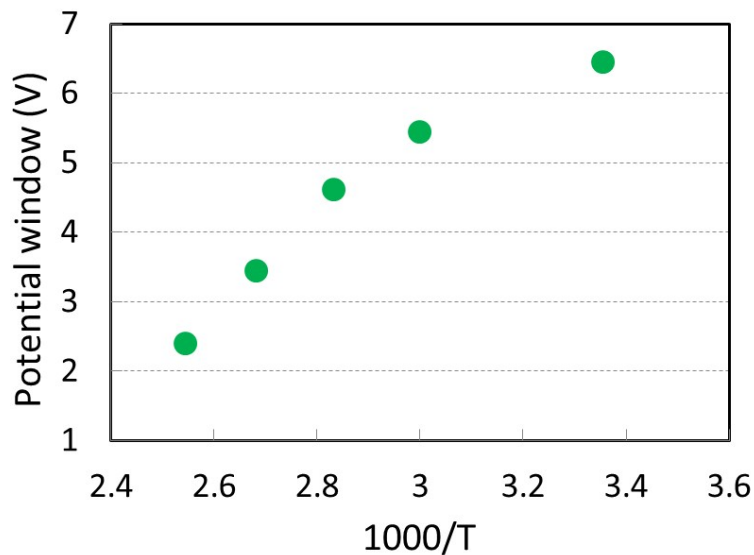

Figure S6. Potential window of the [TFEP]/[LiFSA]=2 electrolyte between 25 and 120 °C.

### 3.4 Cell performance

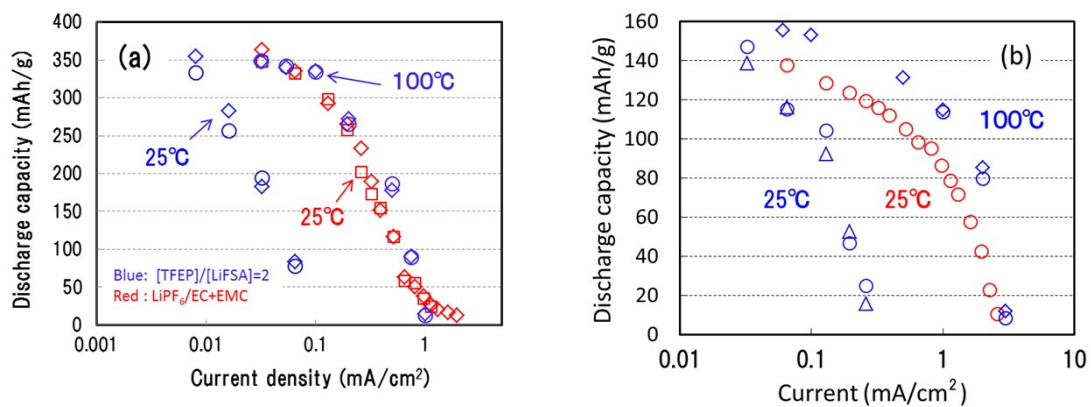

Figure S7. Discharge rate performance of (a) graphite/Li and (b) LiNi<sub>0.8</sub>Co<sub>0.15</sub>Al<sub>0.05</sub>O<sub>2</sub>/Li half cells at 25 °C and 100 °C. The electrolytes were the [TFEP]/[LiFSA]=2 electrolyte (blue), and 1mol/L LiPF<sub>6</sub>/EC+EMC (red).

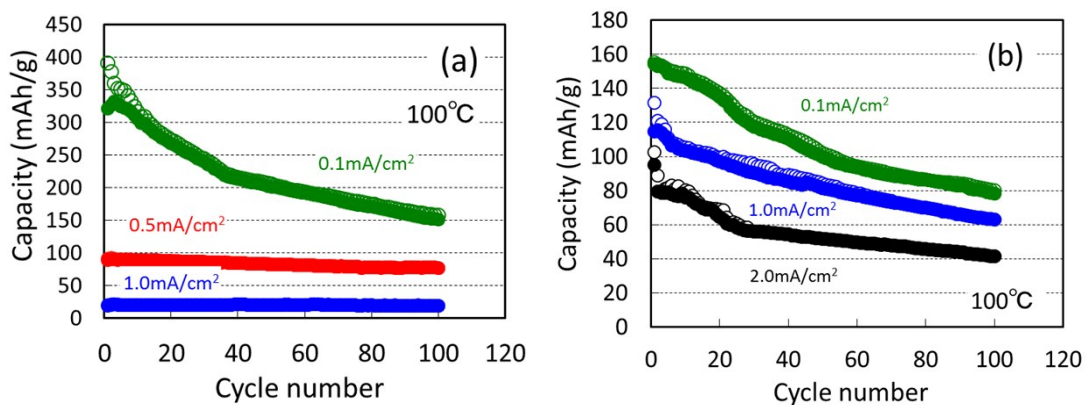

Figure S8. Cycle performance of (a) graphite/Li and (b)  $\text{LiNi}_{0.8}\text{Co}_{0.15}\text{Al}_{0.05}\text{O}_2/\text{Li}$  half cells using the electrolytes were the  $[\text{TFEP}]/[\text{LiFSA}]=2$  electrolyte at 100 °C.

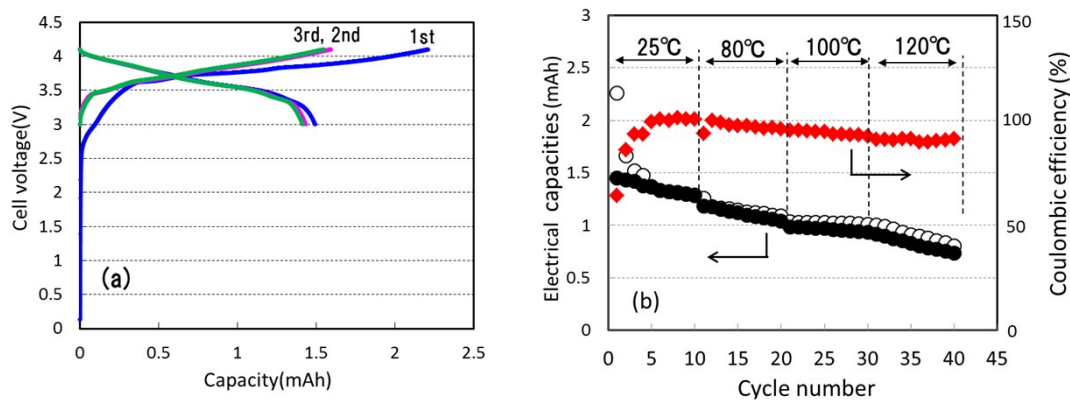

Figure S9. (a) Charge and discharge curves of  $\text{LiNi}_{0.8}\text{Co}_{0.15}\text{Al}_{0.05}\text{O}_2/\text{graphite}$  full cell with the  $[\text{TFEP}]/[\text{LiFSA}]=2$  electrolyte at 25 °C, and (b) cycle performance between 25 and 120 °C; (○) charge capacity, (●) discharge capacity, and (◆) coulombic efficiency.
